# Supplementary material for: Vertically distinct microbial communities in the Mariana and Kermadec trenches
Source: PLoS One. 2018 Apr 5;13(4):e0195102. doi: 10.1371/journal.pone.0195102 (PMC5886532; doi:10.1371/journal.pone.0195102)
Supplement: S5 Table — (XLSX) [file pone.0195102.s019.xlsx]

## Sheet: Sup. Tab. 5. CFUs per mL
Supplementary Table S5. Colony forming units (CFUs) per mL of sample at different sampling locations based on media type and incubation method
Trench	Collection method	Media type	Bulb CFUs/mL, 0.1 Mpa	Plate CFUs/mL, 0.1 Mpa	Bulb CFUs/mL, High pressure
Mariana	Underway	2216	0±0	5±10	0±0
Mariana	CTD01	2216	525±441	270±288	0±0
Mariana	CTD02	2216	25±50	7505±8598	0±0
Mariana	RG02	2216	423±444	217.5±96	0±0
Mariana	RG04	2216	1515±1715	6855±11	0±0
Mariana	RG05	2216	130	17575±17572	0±0
Mariana	RG07	2216	590±535	7040±15126	0±0
Mariana	RG10	2216	893±787	445±21	0±0
Mariana	RG11	2216	803±576	725±758	0±0
Mariana	RG13	2216	1558±1359	8105±15005	0±0
Mariana	RG16	2216	2410±2256	4223±3642	0±0
Mariana	Leggo 1	2216	5338±5390	1640±831	0±0
Kermadec	EL12	2216	-	170	0
Kermadec	EL12	A1	-	50	0
Kermadec	EL12	SW	-	0	0
Kermadec	EL09	SW	-	0	0±0
Kermadec	EL09	2216	0	270	0±0
Kermadec	EL09	A1	-	1000	0±0
Kermadec	EL04	2216	-	90	-
Kermadec	EL04	SW	-	0	-
Kermadec	EL05	2216	-	1000	-
Kermadec	EL05	SW	-	0	-
Kermadec	EL05	A1	-	100	-
